# Supplementary material for: Prime-Pull Immunization with a Bivalent M-Protein and Spy-CEP Peptide Vaccine Adjuvanted with CAF®01 Liposomes Induces Both Mucosal and Peripheral Protection from covR/S Mutant Streptococcus pyogenes
Source: PubMed Central journal article supplement (PMC8545125; doi:10.1128/mbio.03537-20), 2021-02-23
Supplement: mbio.03537-20-sf001.pdf [file mbio.03537-20-sf001.pdf]

## Supplementary Figure

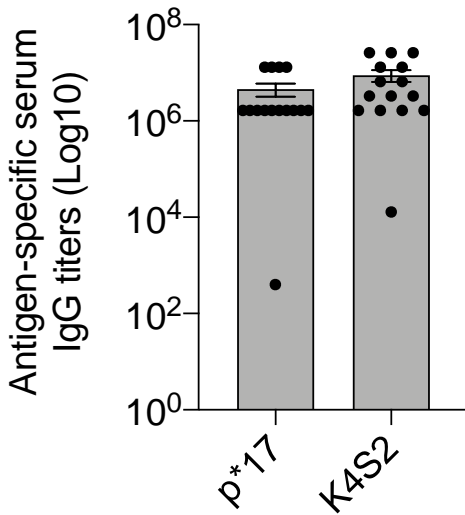

**Supplementary Fig. 1. Humanized HLA mice immunogenicity following vaccination with P\*17/K4S2(DT).** HLA DR3-DQ2-humanized mice (n=15) were immunised via the prime-pull method with P\*17/K4S2(DT) (D0-IM with antigen/CAF<sup>®</sup>01, D21-IM with antigen/CAF<sup>®</sup>01 and D42-IN with antigen/Tris). Antigen-specific serum IgG levels were assessed in vaccinated mice n=15. The end-point titer was defined as the highest dilution that gave an absorbance of >3 standard deviations above the mean absorbance of negative control wells.
