# Supplementary material for: Prime-Pull Immunization with a Bivalent M-Protein and Spy-CEP Peptide Vaccine Adjuvanted with CAF®01 Liposomes Induces Both Mucosal and Peripheral Protection from covR/S Mutant Streptococcus pyogenes
Source: PubMed Central journal article supplement (PMC8545125; doi:10.1128/mbio.03537-20), 2021-02-23
Supplement: mbio.03537-20-st001.pdf [file mbio.03537-20-st001.pdf]

## Supplementary Table

**Table S1. Organs and tissues for histopathological examination**

| Tissue                                      | Organ Weighed | Collected | Microscopic Examination |
|---------------------------------------------|---------------|-----------|-------------------------|
| Adrenal gland                               | X             | X         |                         |
| Aorta                                       |               | X         | X                       |
| Animal Identification                       |               | X         |                         |
| Bone, femur                                 |               | X         |                         |
| Bone with marrow (sternum)                  |               | X         |                         |
| Brain <sup>f</sup>                          | X             | X         | X                       |
| Cecum                                       |               | X         |                         |
| Cervix                                      |               | X         |                         |
| Colon                                       |               | X         |                         |
| Duodenum                                    |               | X         |                         |
| Epididymis                                  | X             | X         |                         |
| Esophagus                                   |               | X         |                         |
| Eye                                         |               | X         |                         |
| Gross lesions                               |               | X         | X                       |
| Harderian gland                             |               | X         |                         |
| Heart                                       | X             | X         | X                       |
| Ileum                                       |               | X         |                         |
| Injection Sites (Right and Left Quadriceps) |               | X         | X                       |
| Jejunum                                     |               | X         |                         |
| Kidney                                      | X             | X         | X                       |
| Larynx                                      |               | X         | X                       |
| Liver                                       | X             | X         | X                       |
| Lung with large bronchi                     | X             | X         | X                       |
| Lymph node (mandibular)                     |               | X         |                         |
| Lymph node (mesenteric)                     |               | X         |                         |
| Mammary gland                               |               | X         |                         |
| Muscle (gastrocnemius)                      |               | X         |                         |
| Nasal Cavity (4 levels)                     |               | X         | X                       |
| Nerve, sciatic                              |               | X         |                         |
| Olfactory Bulb                              |               | X         | X                       |
| Optic nerve                                 |               | X         |                         |
| Ovary                                       | X             | X         |                         |
| Oviduct                                     |               | X         |                         |
| Pancreas                                    |               | X         |                         |
| Parathyroid gland                           |               | X         |                         |
| Peyer's Patch                               |               | X         |                         |
| Pharynx                                     |               | X         | X                       |
| Pituitary gland                             | X             | X         |                         |
| Prostate                                    | X             | X         |                         |

**Table S1. Organs and tissues for histopathological examination**

| <b>Tissue</b>      | <b>Organ Weighed</b> | <b>Collected</b> | <b>Microscopic Examination</b> |
|--------------------|----------------------|------------------|--------------------------------|
| Salivary gland     |                      | X                |                                |
| Seminal vesicle    |                      | X                |                                |
| Skin/subcutis      |                      | X                |                                |
| Spinal cord        |                      | X                |                                |
| Spleen             | X                    | X                |                                |
| Stomach            |                      | X                |                                |
| Testis             | X                    | X                |                                |
| Thymus             | X                    | X                |                                |
| Thyroid gland      | X                    | X                |                                |
| Tongue             |                      | X                |                                |
| Trachea            |                      | X                |                                |
| Trigeminal Pathway |                      | X                | X                              |
| Urinary bladder    |                      | X                |                                |
| Uterus             | X                    | X                |                                |
| Vagina             |                      | X                |                                |

X: activity carried out
